# Supplementary material for: pKAI: a fast and interpretable deep learning approach for accurate electrostatics-driven pKa predictions
Source: Research Square preprint supplement (doi:10.21203/rs.3.rs-949180/v1), 2021-10-05
Supplement: Supplementary file 1 [file fce428a939b401aaaaaab3b4.pdf]

## Supporting Information

# **pKAI: a fast and interpretable deep learning approach for accurate electrostatics-driven $pK_a$ predictions**

Pedro B.P.S. Reis,<sup>\*,†</sup> Marco Bertolini,<sup>‡</sup> Floriane Montanari,<sup>‡</sup> Walter Rocchia,<sup>¶</sup>  
Miguel Machuqueiro,<sup>\*,†</sup> and Djork-Arné Clevert<sup>\*,‡</sup>

<sup>†</sup>*BioISI - Biosystems & Integrative Sciences Institute, Faculty of Sciences, University of  
Lisboa, Campo Grande, 1749-016 Lisboa, Portugal*

<sup>‡</sup>*Bayer A.G., Machine Learning Research, Berlin, Germany*

<sup>¶</sup>*CONCEPT Lab, Istituto Italiano di Tecnologia, Via E. Melen 83, 16152 - Genova, Italy*

E-mail: pdreis@ciencias.ulisboa.pt; machuque@ciencias.ulisboa.pt; djork-arne.clevert@bayer.com

## List of Figures

|    |                                                                                                                                                                                                                                                                                                                                                                                                                                                         |    |
|----|---------------------------------------------------------------------------------------------------------------------------------------------------------------------------------------------------------------------------------------------------------------------------------------------------------------------------------------------------------------------------------------------------------------------------------------------------------|----|
| S1 | RMSE variation versus the magnitude of the $pK_a$ shift ( $\Delta pK_a$ ). The calculations were performed for pKAI and Null model using the PypKa predictions as reference. . . . .                                                                                                                                                                                                                                                                    | S5 |
| S2 | pKAI accuracy at predicting PypKa derived protonation states. . . . .                                                                                                                                                                                                                                                                                                                                                                                   | S6 |
| S3 | Impact of changing the distance of the closest atom on pKAI's predictions for: residue GLU-154 from structure 6FT4 (A); residue LYS-118 from structure 2HRK (C); residue TYR-98 from structure 6FT4 (C); residue LYS-55 from structure 2BJU (D). For reference, we have included PypKa's predictions of the same residue in the state presented in the experimental structure and in an modified structure in which the closest atom is absent. . . . . | S8 |

## List of Tables

|    |                                                                                                                                                                                                                                                                                                                                                                |    |
|----|----------------------------------------------------------------------------------------------------------------------------------------------------------------------------------------------------------------------------------------------------------------------------------------------------------------------------------------------------------------|----|
| S1 | Performance comparison between the Null model (RMSE) and pKAI (RMSE; percentage of errors below 0.5 pH units). Information about the distribution of residue $pK_a$ shifts ( $\Delta pK_a$ ) and relative solvent accessible surface area ( $SASA_r$ ) in the test data is also shown. The Null model was calculated with $\Delta pK_a$ equal to zero. . . . . | S4 |
| S2 | Execution time comparison between PypKa and pKAI. This benchmark was executed on a machine with a single Intel Xeon E5-2620 processor. . . . .                                                                                                                                                                                                                 | S4 |
| S3 | Experimental $pK_a$ benchmark of several methods on a data set of 736 residues from 97 proteins. For each method, we report their RMSE, the mean absolute error (MAE), the 0.9 quantile, and the error percentage below 0.5 $pK$ units. The null model values have been taken from. <sup>1,2</sup> . . . . .                                                   | S5 |
| S4 | Comparison between Null model and pKAI+ RMSE values. The Null model is defined as the $pK_a$ values of the residues in water taken from Reference 1. . . . .                                                                                                                                                                                                   | S6 |

|    |                                                     |    |
|----|-----------------------------------------------------|----|
| S5 | One hot encoding classes of all atoms used. . . . . | S7 |
|----|-----------------------------------------------------|----|

# Results

Table S1: Performance comparison between the Null model (RMSE) and pKAI (RMSE; percentage of errors below 0.5 pH units). Information about the distribution of residue  $pK_a$  shifts ( $\Delta pK_a$ ) and relative solvent accessible surface area ( $SASA_r$ ) in the test data is also shown. The Null model was calculated with  $\Delta pK_a$  equal to zero.

| Residue | Abundance (%) | Null                      | pKAI                      | Error < 0.5 (%) | $\Delta pK_a$ |       | $SASA_r$ |       |
|---------|---------------|---------------------------|---------------------------|-----------------|---------------|-------|----------|-------|
|         |               | RMSE                      | RMSE                      |                 | Avg           | Stdev | Avg      | Stdev |
| GLU     | 24.9          | 1.42                      | 0.44                      | 84.7            | -0.7          | 1.2   | 0.43     | 0.24  |
| LYS     | 22.5          | 1.04                      | 0.32                      | 92.1            | 0.6           | 0.9   | 0.47     | 0.23  |
| ASP     | 21.9          | 1.74                      | 0.50                      | 80.5            | -1.0          | 1.4   | 0.40     | 0.26  |
| TYR     | 13.9          | 3.14                      | 0.69                      | 67.5            | 2.4           | 2.1   | 0.19     | 0.20  |
| HIS     | 9.4           | 1.92                      | 0.67                      | 73.1            | -1.0          | 1.6   | 0.29     | 0.25  |
| CYS     | 3.9           | 3.30                      | 0.82                      | 56.6            | 2.8           | 1.8   | 0.11     | 0.17  |
| NTR     | 1.7           | 0.74                      | 0.28                      | 94.2            | -0.3          | 0.7   | 0.75     | 0.27  |
| CTR     | 1.8           | 0.88                      | 0.35                      | 92.5            | -0.2          | 0.9   | 0.74     | 0.27  |
| All     | 100.0         | 1.89 (1.24 <sup>a</sup> ) | 0.52 (0.31 <sup>a</sup> ) | 81.2            | 0.0           | 1.9   | 0.38     | 0.27  |

<sup>a</sup> Mean Absolute Error (MAE)

Table S2: Execution time comparison between PypKa and pKAI. This benchmark was executed on a machine with a single Intel Xeon E5-2620 processor.

| Protein | Number of residues / titratable | Execution Time (s) |      | Speedup Factor | Time per residue / titratable (s) |             |
|---------|---------------------------------|--------------------|------|----------------|-----------------------------------|-------------|
|         |                                 | PypKa              | pKAI |                | PypKa                             | pKAI        |
| 4LZT    | 129/21                          | 26.5               | 0.8  | 33×            | 0.21/ 1.26                        | 0.006/0.038 |
| 4K5C    | 341/100                         | 92.0               | 1.2  | 76×            | 0.27/ 0.92                        | 0.004/0.012 |
| 7C8J    | 902/249                         | 2898.2             | 2.3  | 1260×          | 3.21/11.64                        | 0.003/0.009 |

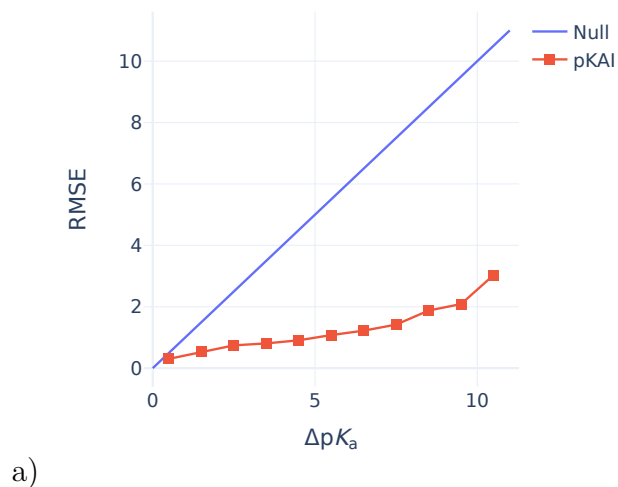

Figure S1: RMSE variation versus the magnitude of the  $pK_a$  shift ( $\Delta pK_a$ ). The calculations were performed for pKAI and Null model using the PypKa predictions as reference.

Table S3: Experimental  $pK_a$  benchmark of several methods on a data set of 736 residues from 97 proteins. For each method, we report their RMSE, the mean absolute error (MAE), the 0.9 quantile, and the error percentage below 0.5  $pK$  units. The null model values have been taken from.<sup>1,2</sup>

|        | RMSE | MAE  | Quantile<br>0.9 | Error<br>< 0.5 (%) |
|--------|------|------|-----------------|--------------------|
| Null   | 1.09 | 0.72 | 1.51            | 52.3               |
| PypKA  | 1.07 | 0.71 | 1.48            | 52.6               |
| PROPKA | 1.11 | 0.73 | 1.58            | 51.1               |
| pKAI   | 1.15 | 0.75 | 1.66            | 49.3               |
| pKAI+  | 0.98 | 0.64 | 1.37            | 55.0               |

Table S4: Comparison between Null model and pKAI+ RMSE values. The Null model is defined as the  $pK_a$  values of the residues in water taken from Reference 1.

| Residue | Abundance (%) | Null RMSE | pKAI+ RMSE | Error < 0.5 (%) | $\Delta pK_a$ |        | SASA <sub>r</sub> |        |
|---------|---------------|-----------|------------|-----------------|---------------|--------|-------------------|--------|
|         |               |           |            |                 | Avg           | Stddev | Avg               | Stddev |
| GLU     | 29.6          | 0.77      | 0.81       | 58.3            | -0.5          | 0.9    | 0.45              | 0.24   |
| LYS     | 14.4          | 0.74      | 0.68       | 60.4            | 0.3           | 0.6    | 0.55              | 0.21   |
| ASP     | 29.2          | 1.30      | 1.08       | 59.5            | -0.6          | 0.9    | 0.45              | 0.25   |
| TYR     | 2.4           | 1.23      | 0.95       | 38.9            | 0.5           | 0.7    | 0.33              | 0.25   |
| HIS     | 19.4          | 1.14      | 0.97       | 42.0            | -0.5          | 1.1    | 0.39              | 0.22   |
| CYS     | 1.2           | 3.39      | 3.43       | 0.0             | -0.1          | 1.5    | 0.11              | 0.09   |
| NTR     | 1.5           | 0.59      | 0.47       | 63.6            | -0.3          | 0.8    | 0.74              | 0.20   |
| CTR     | 2.2           | 0.41      | 0.56       | 75.0            | -0.1          | 0.7    | 0.77              | 0.23   |
| TOTAL   | 100.0         | 1.09      | 0.98       | 55.0            | -0.4          | 1.0    | 0.46              | 0.25   |

<sup>a</sup> Mean Absolute Error (MAE)

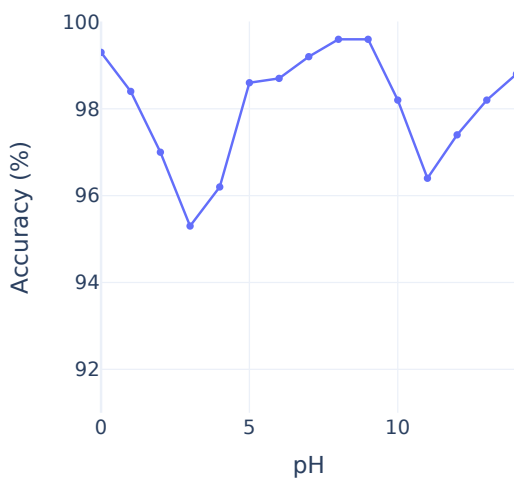

Figure S2: pKAI accuracy at predicting PypKa derived protonation states.

Table S5: One hot encoding classes of all atoms used.

| Atom Name | Residue    | Atom Classes |
|-----------|------------|--------------|
| N         | Main Chain | N            |
| O         | Main Chain | O            |
| NE2       | GLN        | N_AMIDE      |
| ND2       | ASN        | N_AMIDE      |
| OE1       | GLN        | O_AMIDE      |
| OD1       | ASN        | O_AMIDE      |
| NE        | ARG        | NE_ARG       |
| NH1/NH2   | ARG        | NH_ARG       |
| NZ        | LYS        | NZ_LYS       |
| N         | NTR        | NZ_LYS       |
| OXT       | CTR        | O_COOH       |
| OD1/OD2   | ASP        | O_COOH       |
| OE1/OE2   | GLU        | O_COOH       |
| OG        | SER        | OG_SER       |
| OG1       | THR        | OG1_THR      |
| ND1       | HIS        | ND1_HIS      |
| NE2       | HIS        | NE2_HIS      |
| NE1       | TRP        | NE1_TRP      |
| OH        | TYR        | OH_TYR       |
| SG        | CYS        | SG_CYS       |
| SD        | Methionine | SD_MET       |

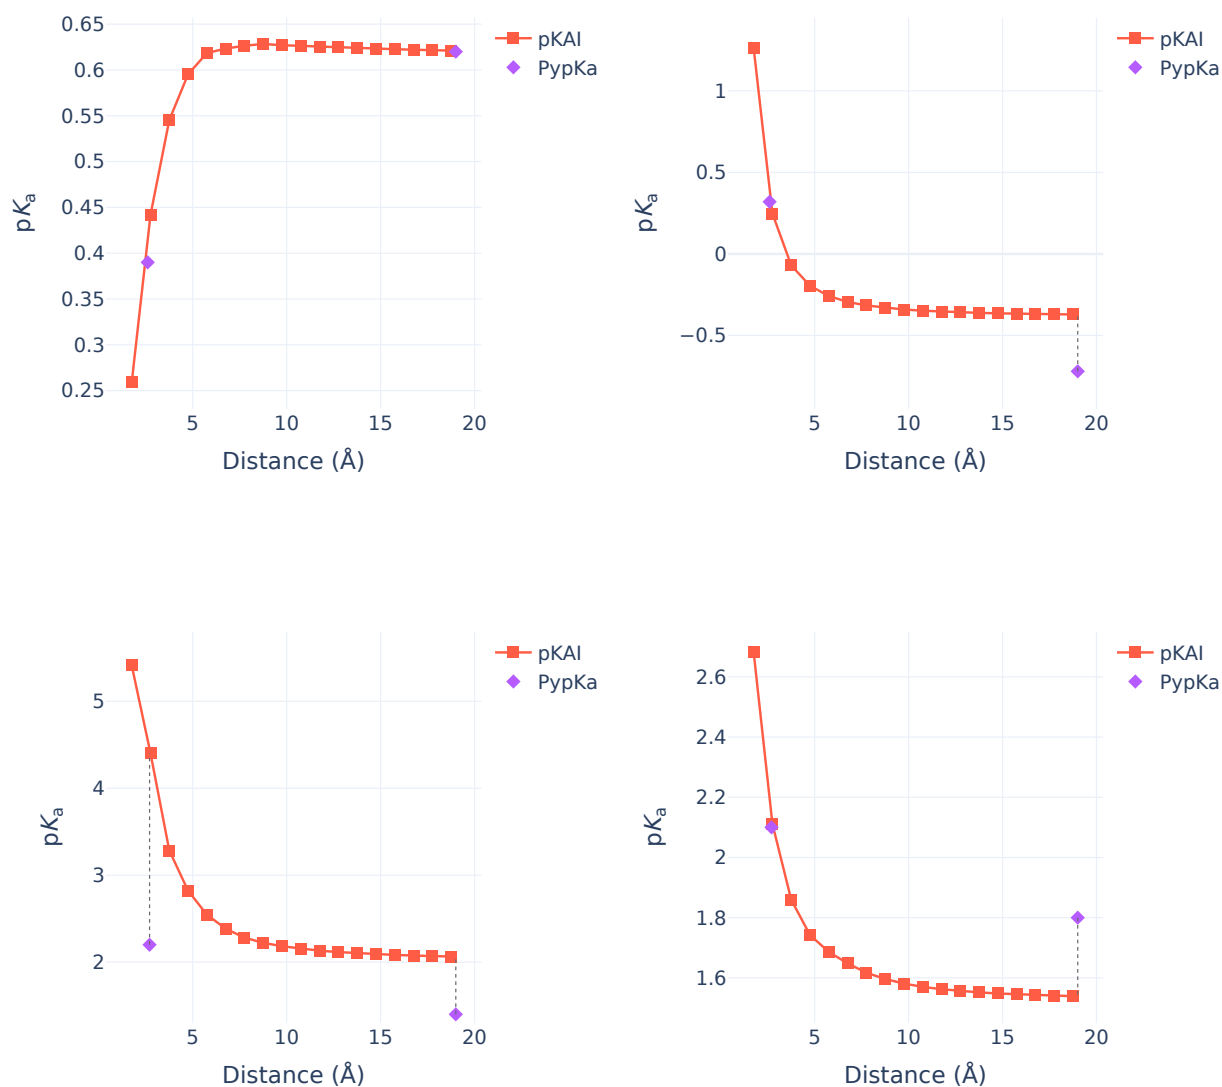

Figure S3: Impact of changing the distance of the closest atom on pKAI's predictions for: residue GLU-154 from structure 6FT4 (A); residue LYS-118 from structure 2HRK (C); residue TYR-98 from structure 6FT4 (C); residue LYS-55 from structure 2BJU (D). For reference, we have included PypKa's predictions of the same residue in the state presented in the experimental structure and in an modified structure in which the closest atom is absent.



## References

- (1) Thurlkill, R. L.; Grimsley, G. R.; Scholtz, J. M.; Pace, C. N.  $pK$  values of the ionizable groups of proteins. *Protein Sci.* **2006**, *15*, 1214–1218.
- (2) Grimsley, G. R.; Scholtz, J. M.; Pace, C. N. A summary of the measured  $pK$  values of the ionizable groups in folded proteins. *Protein Sci.* **2009**, *18*, 247–251.
